# Supplementary material for: Enhancement of Cell Behavior by the Polysaccharide Extract of Arthrospira and Potential Biomedical Applications
Source: MDPI journal article supplement (doi:10.3390/molecules28020732), 2023-01-11
Supplement: s1 [file s1]

## **Supporting information**

# **Enhancement of Cell Behavior by the Polysaccharide Extract of *Arthrospira* and Potential Biomedical Applications**

**Junpeng Xu <sup>1</sup> and Shan-hui Hsu <sup>1,2,\*</sup>**

<sup>1</sup> Institute of Polymer Science and Engineering, National Taiwan University, No. 1, Sec. 4 Roosevelt Road, Taipei 10617, Taiwan

<sup>2</sup> Institute of Cellular and System Medicine, National Health Research Institutes, No. 35 Keyan Road, Miaoli 35053, Taiwan

\* Correspondence: shhsu@ntu.edu.tw; Tel.: +886-2-3366-5313

**Pages: 4**

**Tables: 1 (Table S1)**

**Figures: 4 (Figure S1-S4)**

**Table S1.** The primer sequences used for RT-PCR analyses of mouse NSCs.

| Gene               | Primer               |                         |
|--------------------|----------------------|-------------------------|
|                    | Forward              | Reverse                 |
| mGADPH             | GGCTACAGCAACAGGGTGGT | CGAGTTGGGATAGGGCCTCT    |
| mNestin            | ACTGTGGAATCACCAGGAGG | ATTCCACCTCTCCCAGAGAC    |
| mGFAP              | CTGAACCCTCTGAGCAAATG | GAATCAAACACAGAGCCTGC    |
| m $\beta$ -Tubulin | CAGGGCCAAGACAAGCAGCA | GGAGCCCTAATGAGCTGGTGA   |
| mMAP2              | TTCTCCACTGTGGCTGTTTG | GAGCCTGTTTGTAGACTGGAAGA |

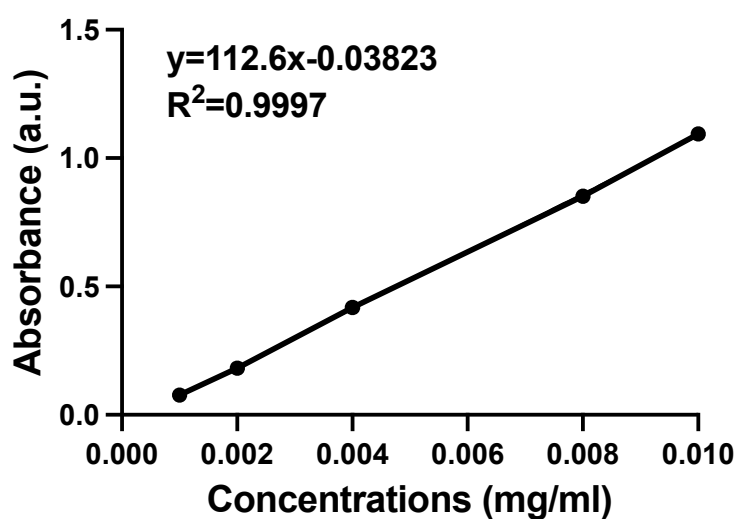

**Figure S1.** The calibration curve for the model drug fast green.

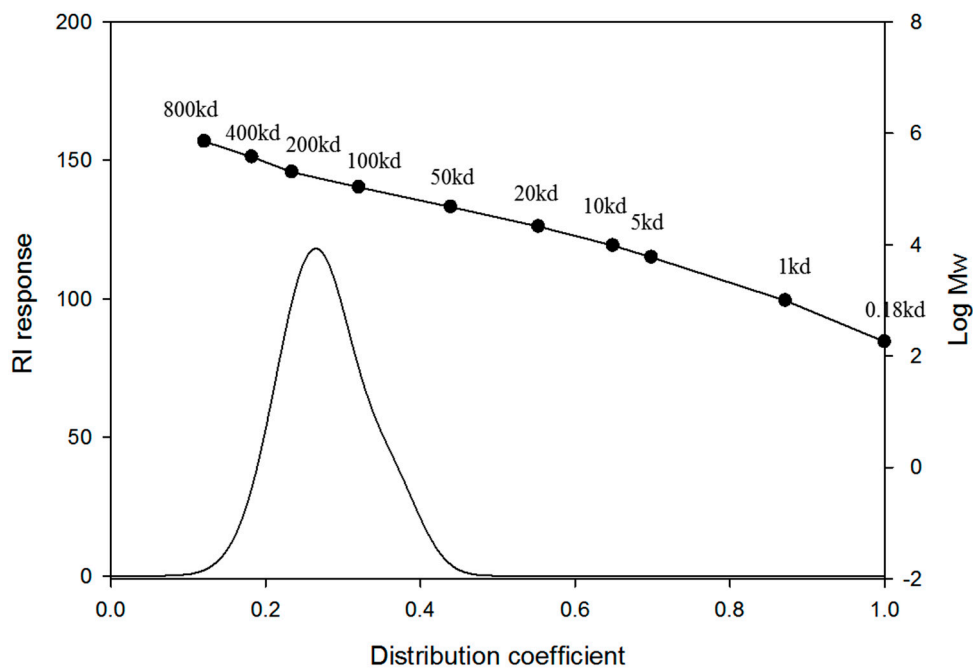

**Figure S2.** The molecular weight distribution of AdSP, showing the high homogeneity of the purified sample.

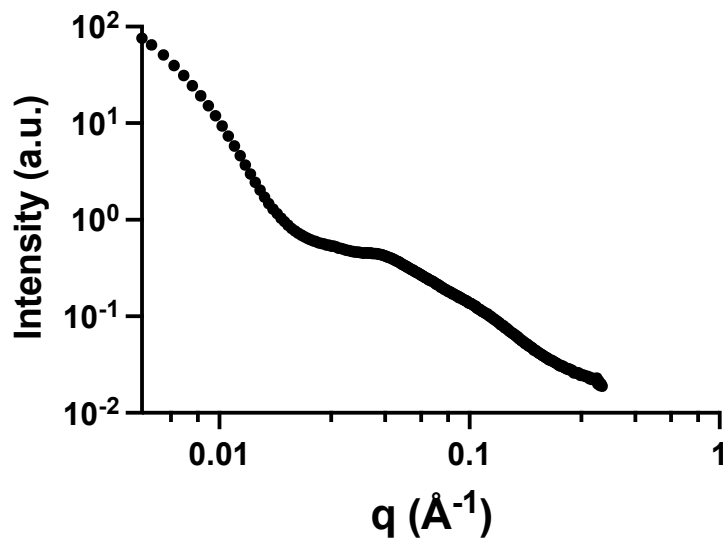

**Figure S3.** The SAXS profile of AdSP in the study.

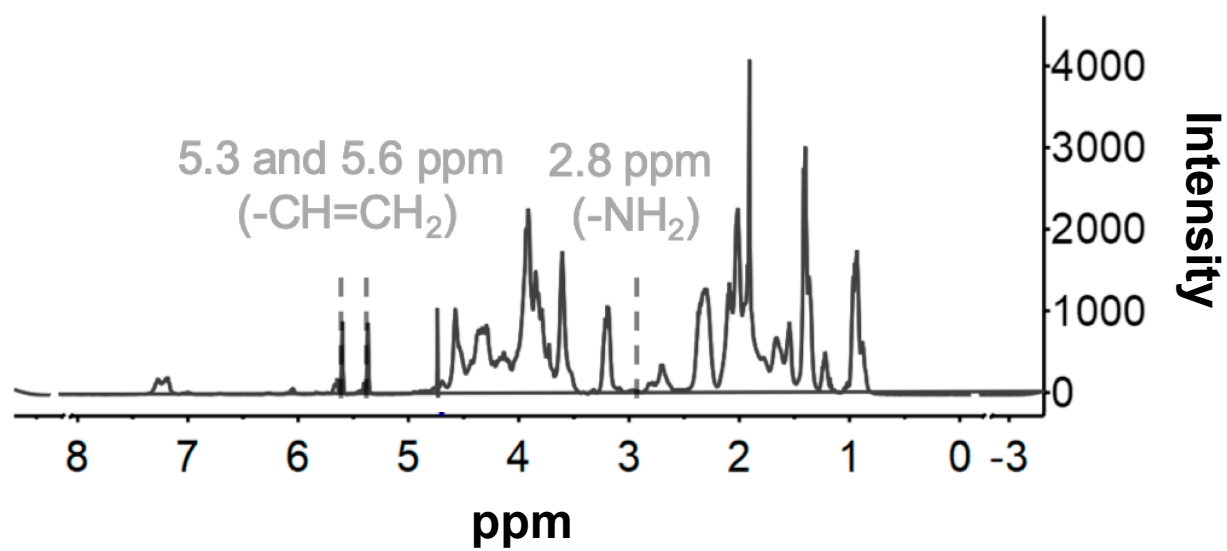

**Figure S4.**  $^1\text{H}$  NMR of GelMA prepared in the study.
